# Supplementary material for: Efficacy and Safety of Transcutaneous Electrical Acupoint Stimulation (TEAS) for Postoperative Pain in Laparoscopy: A Systematic Review and Meta-Analysis of Randomized Controlled Trials
Source: Hindawi journal article supplement (doi:10.1155/2022/9922879), 2022-01-15

INPLASY - International Platform of Registered Systematic  
Review and Meta-analysis Protocols

INVOICE

PUBLICATION FEES - \$20.00

Billing Information

Dan Meng

Shandong University of Traditional Chinese Medicine, China

mengdan1993@sina.com

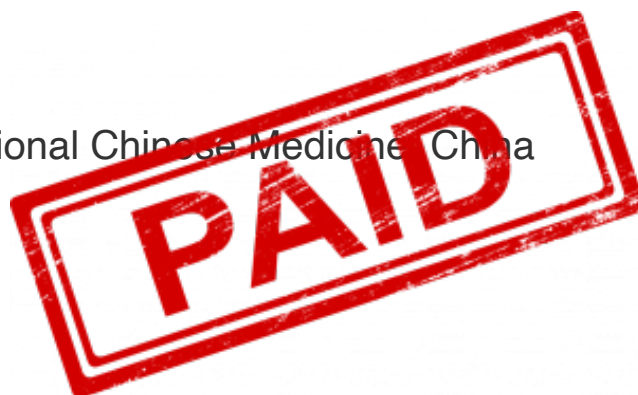

Payment Details

**Payment Method:** WeChat Pay

**Status:** Authorized

Invoice Number: **202150101**

**Protocol:** The Efficacy and Safety of  
Transcutaneous Electrical Acupoint  
Stimulation (TEAS) for Postoperative  
Pain in Laparoscopy: A Protocol for  
Systematic Review and Meta-Analysis of  
Randomized Controlled Trials

**Date:** 28 May 2021

**E-mail:** editorialmanager@inplasy.com

Address - INPLASY, Inc. 651 N Broad St,  
Suite 206, Middletown, DE 19709 US.

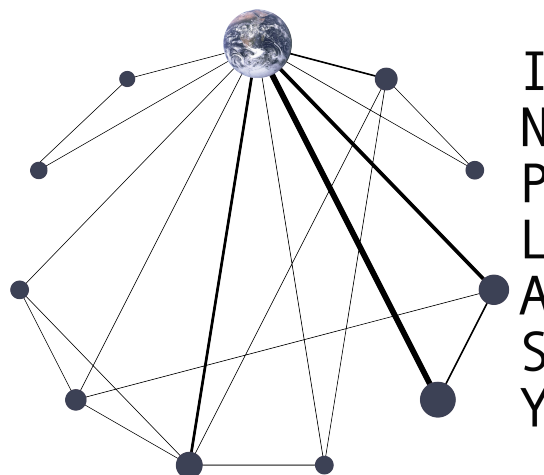

Supplement: f1 [file 9922879.f1.zip]
