# Supplementary figures and images for: Efficacy and Safety of Transcutaneous Electrical Acupoint Stimulation (TEAS) for Postoperative Pain in Laparoscopy: A Systematic Review and Meta-Analysis of Randomized Controlled Trials
Source: Hindawi journal article supplement (doi:10.1155/2022/9922879), 2022-01-15

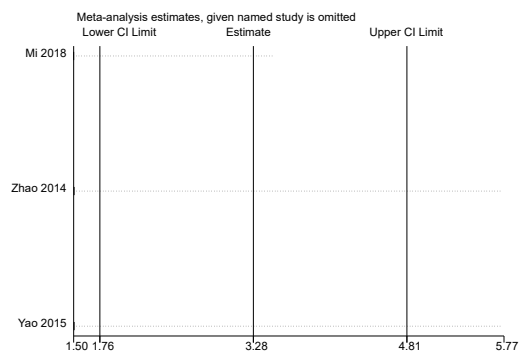

Supplement: f1 [file 9922879.f1.zip]

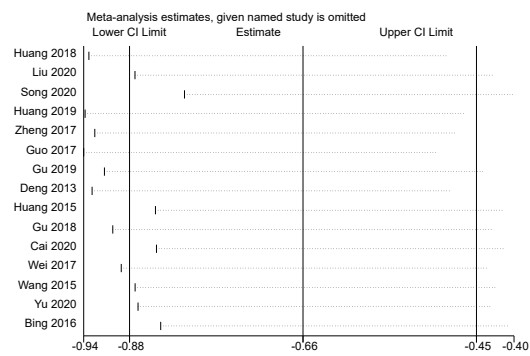

Supplement: f1 [file 9922879.f1.zip]

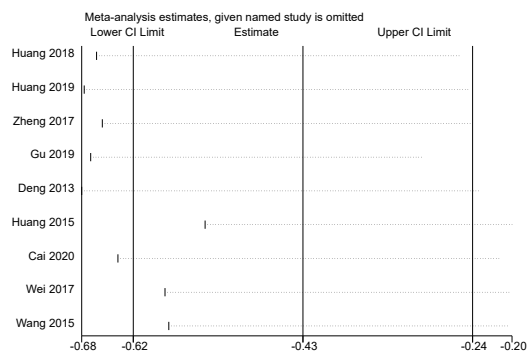

Supplement: f1 [file 9922879.f1.zip]
